# Supplementary material for: A life cycle assessment of Agaricus bisporus mushroom production in the USA
Source: Springer Nature journal article supplement (doi:10.1007/s11367-018-1456-6), 2018-03-12
Supplement: MOESM1 [file 15528808]

Supplementary Material for Robinson, B., Winans, K., Kendall, A., Dlott, J., Dlott, F. (2017) A Life Cycle Assessment of Agaricus Bisporus Mushroom Production in the United States. *International Journal of Life Cycle Assessment*. Please cite original article when using this data.

For questions contact corresponding author: Alissa Kendall, [amkendall@ucdavis.edu](mailto:amkendall@ucdavis.edu)

## Table of Contents

|                                                                                                                                                                                                                                                                                                                                                                                                                                                                                                  |    |
|--------------------------------------------------------------------------------------------------------------------------------------------------------------------------------------------------------------------------------------------------------------------------------------------------------------------------------------------------------------------------------------------------------------------------------------------------------------------------------------------------|----|
| Table S1. Inputs per kg of mushroom product .....                                                                                                                                                                                                                                                                                                                                                                                                                                                | 2  |
| Table S2 – Life cycle inventory data – documentation .....                                                                                                                                                                                                                                                                                                                                                                                                                                       | 3  |
| Table S3. Global warming potential in kg CO <sub>2</sub> e per kg of mushroom product (unweighted average).....                                                                                                                                                                                                                                                                                                                                                                                  | 8  |
| Table S4. Non-renewable, renewable, and total primary energy use in MJ per kg of mushroom product (unweighted average).....                                                                                                                                                                                                                                                                                                                                                                      | 9  |
| Table S5. Total freshwater use in kg of water per kg of mushroom product (unweighted average) .....                                                                                                                                                                                                                                                                                                                                                                                              | 10 |
| Table S6. CML impacts of Human Toxicity Potential (HTP), Marine Aquatic Ecotoxicity Potential (MAETP), Terrestrial Ecotoxicity Potential (TETP), Freshwater Aquatic Ecotoxicity Potential (FAETP), Acidification Potential (AP), Photochemical Ozone Creation Potential (POCP), Ozone Layer Depletion Potential (ODP), Eutrophication Potential (EP), Elements Abiotic Depletion (elements ADP), and Fossil Abiotic Depletion (fossil ADP) per kg of mushroom product (unweighted average) ..... | 11 |
| Table S7. TRACI impacts of Acidification, Ecotoxicity, Eutrophication, Human Health Particulate Air, Human Toxicity (cancer), Human Toxicity (non-cancer), Ozone Depletion, Resources (fossil fuels), and Smog Air per kg of mushroom product (weighted average) .....                                                                                                                                                                                                                           | 12 |
| Table S8. TRACI impacts of Acidification, Ecotoxicity, Eutrophication, Human Health Particulate Air, Human Toxicity (cancer), Human Toxicity (non-cancer), Ozone Depletion, Resources (fossil fuels), and Smog Air per kg of mushroom product (unweighted average) .....                                                                                                                                                                                                                         | 13 |
| Table S9. Average transport distances of each material from the manufacturer to the facility gate by phase for U.S. mushroom production .....                                                                                                                                                                                                                                                                                                                                                    | 14 |

Table S1. Inputs per kg of mushroom product

| Inputs                                      | Unit per kg mushroom | Weighted Average      | Unweighted Average    | Input Category      |
|---------------------------------------------|----------------------|-----------------------|-----------------------|---------------------|
| AMS ammonium sulfate                        | kg                   | $3.56 \times 10^{-3}$ | $2.27 \times 10^{-3}$ | Compost Materials   |
| Brewer/distiller's grain                    | kg                   | $6.27 \times 10^{-3}$ | $1.76 \times 10^{-2}$ | Compost Materials   |
| Casing inoculum                             | kg                   | $5.62 \times 10^{-3}$ | $5.72 \times 10^{-3}$ | Growing Materials   |
| Cocoa bean hulls                            | kg                   | $9.34 \times 10^{-2}$ | $5.96 \times 10^{-2}$ | Compost Materials   |
| Compost - finished                          | kg                   | 3.47                  | 3.63                  | Growing Materials   |
| Compost - phase 1                           | kg                   | 5.13                  | 5.45                  | Compost Materials   |
| Compressed natural gas                      | kg                   | $4.40 \times 10^{-4}$ | $1.14 \times 10^{-2}$ | Natural Gas         |
| Corn stover                                 | kg                   | $1.60 \times 10^{-1}$ | $1.07 \times 10^{-1}$ | Compost Materials   |
| Corn cobs                                   | kg                   | $1.33 \times 10^{-1}$ | $8.49 \times 10^{-2}$ | Compost Materials   |
| Cotton seed burrs                           | kg                   | $2.51 \times 10^{-3}$ | $7.05 \times 10^{-3}$ | Compost Materials   |
| Cotton seed hulls                           | kg                   | $2.24 \times 10^{-2}$ | $2.14 \times 10^{-2}$ | Compost Materials   |
| Cotton seed meal                            | kg                   | $3.34 \times 10^{-2}$ | $5.17 \times 10^{-2}$ | Compost Materials   |
| Diesel                                      | Gal                  | $6.01 \times 10^{-3}$ | $8.81 \times 10^{-3}$ | Diesel              |
| Dried poultry waste                         | kg                   | $5.25 \times 10^{-2}$ | $5.01 \times 10^{-2}$ | Compost Materials   |
| Electricity                                 | kWh                  | $6.90 \times 10^{-1}$ | $7.70 \times 10^{-1}$ | Electricity         |
| Electricity generation fuel - walnut shells | kg                   | $1.64 \times 10^{-2}$ | $7.84 \times 10^{-3}$ | -                   |
| Fungicides (aqueous)                        | Gal                  | $7.07 \times 10^{-6}$ | $6.95 \times 10^{-6}$ | Pesticides          |
| Fungicides (solid)                          | kg                   | $3.18 \times 10^{-5}$ | $2.68 \times 10^{-5}$ | Pesticides          |
| Grape pomace                                | kg                   | $7.86 \times 10^{-3}$ | $7.50 \times 10^{-3}$ | Compost Materials   |
| Gypsum - mined                              | kg                   | $7.79 \times 10^{-2}$ | $3.17 \times 10^{-1}$ | Compost Materials   |
| Gypsum - recycled                           | kg                   | $3.85 \times 10^{-2}$ | $3.11 \times 10^{-2}$ | Compost Materials   |
| Hardwood tree leaves                        | kg                   | $1.11 \times 10^{-2}$ | $7.06 \times 10^{-3}$ | Compost Materials   |
| Hay                                         | kg                   | $6.17 \times 10^{-1}$ | $3.94 \times 10^{-1}$ | Compost Materials   |
| Heating oil                                 | Gal                  | $7.17 \times 10^{-3}$ | $7.32 \times 10^{-3}$ | Heating Oil         |
| Herbicides                                  | Gal                  | $1.38 \times 10^{-7}$ | $9.63 \times 10^{-8}$ | Pesticides          |
| Insect growth regulators                    | Gal                  | $1.52 \times 10^{-4}$ | $1.28 \times 10^{-4}$ | Pesticides          |
| Insecticides                                | Gal                  | $5.44 \times 10^{-6}$ | $9.53 \times 10^{-6}$ | Pesticides          |
| Lime - hydrated                             | kg                   | $4.25 \times 10^{-3}$ | $4.25 \times 10^{-3}$ | Growing Materials   |
| Lime - sugar beet                           | kg                   | $3.10 \times 10^{-2}$ | $5.87 \times 10^{-2}$ | Growing Materials   |
| Limestone                                   | kg                   | $5.15 \times 10^{-2}$ | $5.16 \times 10^{-2}$ | Growing Materials   |
| Liquefied petroleum gas (LPG)               | Gal                  | $1.58 \times 10^{-3}$ | $1.55 \times 10^{-3}$ | LPG                 |
| Natural gas                                 | kg                   | $2.02 \times 10^{-2}$ | $2.07 \times 10^{-2}$ | Natural Gas         |
| Nitrogen sources                            | kg                   | $2.20 \times 10^{-2}$ | $1.68 \times 10^{-2}$ | Compost Materials   |
| Peat moss - black/reed sedge                | kg                   | $7.94 \times 10^{-2}$ | $6.31 \times 10^{-2}$ | Peat                |
| Peat moss - sphagnum                        | kg                   | $5.40 \times 10^{-1}$ | $5.35 \times 10^{-1}$ | Peat                |
| PIMA                                        | kg                   | $6.79 \times 10^{-3}$ | $6.48 \times 10^{-3}$ | Compost Materials   |
| Poultry litter/manure                       | kg                   | $4.53 \times 10^{-1}$ | $5.39 \times 10^{-1}$ | Compost Materials   |
| Refrigerant - Propylene Glycol 2            | kg                   | $1.55 \times 10^{-7}$ | $1.49 \times 10^{-7}$ | Refrigerants        |
| Refrigerant - R-11 (CFC-11)                 | kg                   | $7.24 \times 10^{-9}$ | $1.40 \times 10^{-8}$ | Refrigerants        |
| Refrigerant - R-12 (CFC-12)                 | kg                   | $1.18 \times 10^{-7}$ | $2.27 \times 10^{-7}$ | Refrigerants        |
| Refrigerant - R-22 (HFC-22)                 | kg                   | $2.77 \times 10^{-5}$ | $2.27 \times 10^{-5}$ | Refrigerants        |
| Refrigerant - R-123                         | kg                   | $2.41 \times 10^{-8}$ | $4.66 \times 10^{-8}$ | Refrigerants        |
| Refrigerant - R-410a (HCFC-410a)            | kg                   | $4.84 \times 10^{-6}$ | $3.17 \times 10^{-6}$ | Refrigerants        |
| Refrigerant - unspecified                   | kg                   | $5.24 \times 10^{-6}$ | $4.60 \times 10^{-6}$ | Refrigerants        |
| Sanitizers (aqueous)                        | Gal                  | $1.31 \times 10^{-4}$ | $1.87 \times 10^{-4}$ | Sanitizers          |
| Sanitizers (solid)                          | kg                   | $9.72 \times 10^{-5}$ | $8.71 \times 10^{-5}$ | Sanitizers          |
| Spawn                                       | kg                   | $2.64 \times 10^{-2}$ | $2.60 \times 10^{-2}$ | Spawn & Supplements |
| Straw-bedded horse manure                   | kg                   | $8.37 \times 10^{-1}$ | $5.34 \times 10^{-1}$ | Compost Materials   |
| Straw - wheat                               | kg                   | $5.02 \times 10^{-1}$ | $9.77 \times 10^{-1}$ | Compost Materials   |
| Supplements                                 | kg                   | $3.10 \times 10^{-2}$ | $3.04 \times 10^{-2}$ | Spawn & Supplements |
| Water - freshwater                          | Gal                  | 1.16                  | 1.01                  | On-Site Water Use   |
| Water - precipitation                       | Gal                  | $6.66 \times 10^{-1}$ | $6.48 \times 10^{-1}$ | Compost Materials   |
| Urea 45                                     | kg                   | $1.34 \times 10^{-3}$ | $3.10 \times 10^{-3}$ | Compost Materials   |
| Urea 46                                     | kg                   | $1.04 \times 10^{-4}$ | $2.92 \times 10^{-4}$ | Compost Materials   |

Table S2 – Life cycle inventory data – documentation

| Source <sup>a</sup> | Region                 | Years Valid | LCI Name                                                                  | Inputs                                      | Formula/Notes                                                     |
|---------------------|------------------------|-------------|---------------------------------------------------------------------------|---------------------------------------------|-------------------------------------------------------------------|
| E                   | RER                    | 2015        | ammonium sulfate production                                               | AMS ammonium sulfate (nitrogen source)      | Used as is                                                        |
| E                   | GLO                    | 2015        | Distiller's Dried Grains with Solubles to generic market for protein feed | Brewer/distiller's grain                    | Used as is                                                        |
| E                   | Canada-<br>QC          | 2015        | peat moss production, horticultural use                                   | Casing Inoculum                             | LCI*(1121kg/m3)*(0.9898190332) for 1 kg casing inoculum           |
| E/G                 | RNA                    | 2015-2018   | Spawn (developed)                                                         | Casing Inoculum                             | LCI*(1/3)*(0.0101809668) for 1 kg casing inoculum                 |
| -                   | -                      | -           | -                                                                         | Cocoa bean hulls                            | Waste Product (no LCI needed / only transportation accounted for) |
| -                   | -                      | -           | -                                                                         | Compost - Finished                          | Accounted for in Model                                            |
| -                   | -                      | -           | -                                                                         | Compost - Phase 1                           | Accounted for in Model                                            |
| G                   | US                     | 2012 - 2018 | Natural gas mix                                                           | Compressed Natural Gas (CNG) - Production   | Used as is                                                        |
| G                   | RNA                    | 2009 - 2016 | Natural gas, combusted in industrial equipment                            | Compressed Natural Gas (CNG) - Combustion   | Used as is                                                        |
| G                   | US                     | 2015 - 2018 | Corn straw, at field (30% H2O content) (economic allocation)              | Corn stover                                 | Used as is                                                        |
| G                   | US                     | 2009 - 2013 | Grinding (developed)                                                      | Corncobs                                    | Used as is                                                        |
| -                   | -                      | -           | -                                                                         | Cotton seed burrs                           | Waste Product (no LCI needed / only transportation accounted for) |
| G                   | US                     | 2015 - 2018 | Cottonseed hulls (economic allocation)                                    | Cotton seed hulls                           | Used as is                                                        |
| G                   | US                     | 2015 - 2018 | Cottonseed meal (economic allocation)                                     | Cotton seed meal                            | Used as is                                                        |
| G                   | US                     | 2012 - 2018 | Diesel mix at filling station                                             | Diesel - Production                         | Used as is                                                        |
| G                   | US                     | 2009 - 2016 | Diesel, combusted in industrial equipment                                 | Diesel - Combustion                         | Used as is                                                        |
| E                   | Switzerlan<br>d<br>US- | 2015        | treatment of poultry manure, drying, pelleting                            | Dried poultry waste (DPW)                   | Used as is                                                        |
| G                   | CAMX                   | 2010 - 2018 | Electricity grid mix - CAMX                                               | Electricity - CA                            | Used as is                                                        |
| G                   | Canada                 | 2012 - 2018 | Electricity grid mix - CAN                                                | Electricity - CAN                           | Used as is                                                        |
| G                   | US-PJM                 | 2010 - 2018 | Electricity grid mix - PJM                                                | Electricity - MD                            | Used as is                                                        |
| G                   | US-SPSO                | 2010 - 2018 | Electricity grid mix - SPSO                                               | Electricity - OK                            | Used as is                                                        |
| G                   | US-PJM                 | 2010 - 2018 | Electricity grid mix - PJM                                                | Electricity - PA                            | Used as is                                                        |
| G                   | US-ERCT                | 2010 - 2018 | Electricity grid mix - ERCT                                               | Electricity - TX                            | Used as is                                                        |
| -                   | -                      | -           | -                                                                         | Electricity Generation Fuel - Walnut Shells | Waste Product (no LCI needed / only transportation accounted for) |

<sup>a</sup>G refers to GaBi database and E refers to Ecoinvent database

[Table S2 continued]

|   |             |             |                                                                                                                         |                                              |                                                                                              |
|---|-------------|-------------|-------------------------------------------------------------------------------------------------------------------------|----------------------------------------------|----------------------------------------------------------------------------------------------|
| E | RER         | 2015        | chlorothalonil production                                                                                               | Fungicide - Bravo                            | LCI*(54%); [1.34 g/mL*.54 = 2.7391 kg LCI/Gal]                                               |
| G | EU-27       | 2015 - 2018 | Yeast                                                                                                                   | Fungicide - Jazz                             | LCI*(14.6%)                                                                                  |
| E | RER         | 2015        | benzimidazole-compound production                                                                                       | Fungicide - Mecuria/Mertect                  | [4.0 lbs AI/gal = 1.8144 kg LCI/Gal]                                                         |
| E | RER         | 2015        | pesticide production, unspecified                                                                                       | Fungicide, Insecticide, Miticide - Phor-Ex   | Used as is because piperonyl butoxide is missing                                             |
| G | RNA         | 2009 - 2016 | Palm kernel oil, processed, at plant                                                                                    | Fungicide, Insecticide, Miticide - Trilogy   | LCI*(70%); [5.46 lbs/gal*.7 = 1.7336 kg LCI/Gal]                                             |
| - | -           | -           | -                                                                                                                       | Grape pomace                                 | Waste Product (no LCI needed / only transportation accounted for)                            |
| G | Germany     | 2015 - 2018 | Gypsum stone (CaSO4-Dihydrate) (EN15804 A1-A3) [grinded and purified] treatment of waste gypsum plasterboard, recycling | Gypsum - mined                               | Used as is                                                                                   |
| E | Switzerland | 2015        | recycling                                                                                                               | Gypsum - recycled                            | Used as is                                                                                   |
| - | -           | -           | -                                                                                                                       | Hardwood tree leaves                         | Waste Product (no LCI needed / only transportation accounted for)                            |
| E | Switzerland | 2015        | hay production, Swiss integrated production, intensive                                                                  | Hay                                          | LCI*(\$65/\$165) = LCI*0.394                                                                 |
| G | US          | 2012 - 2018 | Diesel mix at filling station                                                                                           | Heating Oil - Production                     | Used as is                                                                                   |
| G | US          | 2009 - 2016 | Diesel, combusted in industrial boiler                                                                                  | Heating Oil - Combustion                     | Used as is                                                                                   |
| E | RER         | 2015        | diphenylether-compound production                                                                                       | Herbicide - Goal                             | [240 g AI/L = 0.9085 kg LCI/Gal]<br>LCI*(49%); [1.3522 g/cm3*.49 = 2.5081 kg LCI/Gal]        |
| E | RER         | 2015        | glyphosate production                                                                                                   | Herbicide - Roundup                          | LCI*(5.0%); [0.42 lbs/gal*.05 = 0.009525 kg LCI/Gal]                                         |
| E | RER         | 2015        | triazine-compound production, unspecified [x 0.05 AI; 0.42lbs AI per gal]                                               | Insect Growth Regulator - Aegis/Armor        |                                                                                              |
| G | RNA         | 2009 - 2016 | Palm kernel oil, processed, at plant                                                                                    | Insect Growth Regulator - NEEMIX 4.5         | [0.39 lbs AI/gal = 0.1769 kg LCI/Gal]<br>LCI*(36.8%); [3.2 lbs/gal*.368 = 0.5342 kg LCI/Gal] |
| E | RER         | 2015        | pyrethroid-compound production                                                                                          | Insecticide - Permethrin/Perm-Up             | Used as is because piperonyl butoxide is missing                                             |
| E | RER         | 2015        | pesticide production, unspecified                                                                                       | Insecticide - Prentox/Pyronyl Fogging PF     |                                                                                              |
| G | RNA         | 2009 - 2016 | White mineral oil, at plant                                                                                             | Insecticide, Miticide - Stylet Oil (organic) | LCI*(97.1%); [0.86 g/cm3*.971 = 3.1610 kg LCI/Gal]                                           |
| G | DE          | 2015 - 2018 | Calcium hydroxide (Ca(OH)2; dry; slaked lime) (EN15804 A1-A3)                                                           | Lime - hydrated                              | Used as is                                                                                   |
| - | -           | -           | -                                                                                                                       | Lime - sugar beet                            | Waste Product (no LCI needed / only transportation accounted for)                            |
| G | US          | 2015 - 2018 | Limestone (CaCO3; washed)                                                                                               | Limestone                                    | Used as is                                                                                   |

[Table S2 continued]

|         |           |             |                                                                |                                                        |                                                                   |
|---------|-----------|-------------|----------------------------------------------------------------|--------------------------------------------------------|-------------------------------------------------------------------|
| G       | US        | 2012 - 2018 | Liquefied Petroleum Gas (LPG) (70% propane; 30% butane)        | Liquefied Petroleum Gas (LPG) - Production             | Used as is                                                        |
| G       | US        | 2009 - 2016 | Liquefied petroleum gas, combusted in industrial boiler        | Liquefied Petroleum Gas (LPG) - Combustion             | Used as is                                                        |
| G       | US        | 2012 - 2018 | Natural gas mix                                                | Natural Gas - Production                               | Used as is                                                        |
| G       | RNA       | 2009 - 2016 | Natural gas, combusted in industrial equipment                 | Natural Gas - Combustion                               | Used as is                                                        |
| G       | US        | 2009 - 2016 | Nitrogen fertilizer, production mix, at plant                  | Nitrogen Source - Good N Green                         | Used as is                                                        |
| E       | Canada-QC | 2015        | peat moss production, horticultural use                        | Peat moss - black/reed sedge                           | LCI*(801kg/m3)                                                    |
| E       | Canada-QC | 2015        | peat moss production, horticultural use                        | Peat moss - sphagnum                                   | LCI*(801kg/m3)                                                    |
| -       | -         | -           | -                                                              | PIMA                                                   | Waste Product (no LCI needed / only transportation accounted for) |
| -       | -         | -           | -                                                              | Poultry litter/manure                                  | Waste Product (no LCI needed / only transportation accounted for) |
| G       | US        | 2015 - 2018 | Propylene glycol (via PO-hydrogenation)                        | Refrigerant - Propylene Glycol 2                       | Used as is; no on-site emissions assigned                         |
| G       | US        | 2015 - 2018 | Chlorodifluoromethane (R22, HCFC-22) (estimation)              | Refrigerant - R-11 (CFC-11)                            | Used as is because R-22 replaced R-11                             |
| G       | US        | 2015 - 2018 | Chlorodifluoromethane (R22, HCFC-22) (estimation)              | Refrigerant - R-12 (CFC-12)                            | Used as is because R-22 replaced R-12                             |
| G       | US        | 2015 - 2018 | Chlorodifluoromethane (R22, HCFC-22) (estimation)              | Refrigerant - R-22 (HFC-22)                            | Used as is                                                        |
| G       | US        | 2015 - 2018 | Chlorodifluoromethane (R22, HCFC-22) (estimation)              | Refrigerant - R-123 (HCFC-123)                         | Used as is because R-123 is an HCFC                               |
| G       | US        | 2015 - 2018 | Pentafluoroethane, HFC 125, R125 (estimated from HCF 152a)     | Refrigerant - R-410a (HFC-410a)                        | Used as is because R-410a is an HFC (and half R-125 already)      |
| G       | US        | 2015 - 2018 | Pentafluoroethane, HFC 125, R125 (estimated from HCF 152a)     | Refrigerant - Unspecified                              | Used as is                                                        |
| E/<br>G | RER/US    | 2015 - 2018 | Peroxyacetic Acid (developed)                                  | Sanitizer - Bio-15                                     | LCI*(15%); [1.0375 g/mL*.15 = 0.5891 kg LCI/Gal]                  |
| E       | RER       | 2015        | esterquat production, from coconut oil and palm kernel oil     | Sanitizer - Boost 3200 (quaternary ammonium compounds) | LCI*(6.0%); [1.02 g/cm3*.06 = 0.2317 kg LCI/Gal]                  |
| G       | US        | 2015 - 2018 | Hydrogen peroxide (100%; H2O2) (Hydrogen from steam reforming) | Sanitizer - Boost 3200 (hydrogen peroxide)             | LCI*(6.3%); [1.45 g/cm3*.063 = 0.3458 kg LCI/Gal]                 |
| G       | US        | 2015 - 2018 | Potassium Carbonate (developed)                                | Sanitizer - Boost 3201 (potassium carbonate)           | LCI*(6.0%); [2.43 g/cm3*.06 = 0.5519 kg LCI/Gal]                  |

[Table S2 continued]

|         |        |             |                                                                                          |                                               |                                                                   |
|---------|--------|-------------|------------------------------------------------------------------------------------------|-----------------------------------------------|-------------------------------------------------------------------|
| G       | US     | 2015 - 2018 | Soda (Na <sub>2</sub> CO <sub>3</sub> )                                                  | Sanitizer - Boost 3201 (sodium carbonate)     | LCI*(6.0%); [2.54 g/cm <sup>3</sup> *.06 = 0.5769 kg LCI/Gal]     |
| E       | RER    | 2015        | EDTA production                                                                          | Sanitizer - Boost 3201 (tetrasodium EDTA)     | LCI*(4.9%); [860 mg/mL*.049 = 0.1595 kg LCI/Gal]                  |
| E       | GLO    | 2015        | market for calcium chloride                                                              | Sanitizer - Calcium Chloride                  | Used as is                                                        |
| G       | US     | 2015 - 2018 | Calcium hypochlorite (developed)                                                         | Sanitizer - Calcium Hypochlorite              | LCI*(100%); Used as is                                            |
| G       | US     | 2015 - 2018 | Hydrogen peroxide (100%; H <sub>2</sub> O <sub>2</sub> ) (Hydrogen from steam reforming) | Sanitizer - Oxonia Active (hydrogen peroxide) | LCI*(27.5%); [1.45 g/cm <sup>3</sup> *.275 = 1.5094 kg LCI/Gal]   |
| E/<br>G | RER/US | 2015 - 2018 | Peroxyacetic Acid (developed)                                                            | Sanitizer - Oxonia Active (peroxyacetic acid) | LCI*(5.8%); [1.0375 g/mL*.058 = 0.2278 kg LCI/Gal]                |
| G       | US     | 2015 - 2018 | Phenol (from cumene)                                                                     | Sanitizer - Phenols (1 stroke)                | LCI*(20.5%); [1.08g/cm <sup>3</sup> *.205 = 0.8381 kg LCI/Gal]    |
| E       | RER    | 2015        | esterquat production, from coconut oil and palm kernel oil                               | Sanitizer - Quaternary Ammonium Chloride      | LCI*(50%); [8.1 lbs/gal*.5 = 1.8371 kg LCI/Gal]                   |
| E       | RER    | 2015        | esterquat production, from coconut oil and palm kernel oil                               | Sanitizer - Quorum Clear                      | LCI*(7.5%); [8.1 lbs/gal*.075 = 0.2756 kg LCI/Gal]                |
| E       | RER    | 2015        | esterquat production, from coconut oil and palm kernel oil                               | Sanitizer - Sani Step (Quat)                  | LCI*(1.197%); [8.1 lbs/gal*.01197 = 0.04398 kg LCI/Gal]           |
| E       | RER    | 2015        | esterquat production, from coconut oil and palm kernel oil                               | Sanitizer - Sani-T-10                         | LCI*(10.0%); [8.1 lbs/gal*.1 = 0.3674 kg LCI/Gal]                 |
| G       | US     | 2015 - 2018 | Sodium hypochlorite solution                                                             | Sanitizer - Sodium Hypochlorite               | [1.11 g/cm <sup>3</sup> = 4.2018 kg/Gal]                          |
| E       | RER    | 2015        | esterquat production, from coconut oil and palm kernel oil                               | Sanitizer - Verticide                         | LCI*(15.36%); [1.02 g/cm <sup>3</sup> *.1536 = 0.5931 kg LCI/Gal] |
| E/<br>G | RNA    | 2015-2018   | Spawn (developed)                                                                        | Spawn                                         | Use as is                                                         |
| -       | -      | -           | -                                                                                        | Spent compost (on-site recycled)              | Accounted for in Model                                            |
| -       | -      | -           | -                                                                                        | Straw-bedded horse manure                     | Waste Product (no LCI needed / only transportation accounted for) |
| G       | US     | 2009 - 2016 | Wheat, at field                                                                          | Straw - wheat                                 | [Grain: \$5.27/bushel = 0.981*LCI; Straw: \$160/ton = 0.019*LCI]  |
| -       | -      | -           | -                                                                                        | Stumps (on-site recycled)                     | Accounted for in Model                                            |
| G       | US     | 2015 - 2018 | Supplements (developed)                                                                  | Supplements                                   | Use as is                                                         |
| G       | US     | 2009 - 2016 | Transport, combination truck, average fuel mix                                           | Transportation                                | Use as is                                                         |
| E       | CA-QC  | 2015        | -                                                                                        | Water - freshwater                            | Pumping accounted for in model                                    |
| -       | -      | -           | -                                                                                        | Water - precipitation                         | Waste Product (no LCI needed / only transportation accounted for) |

[Table S2 continued]

|   |    |             |                 |                           |                                                                   |
|---|----|-------------|-----------------|---------------------------|-------------------------------------------------------------------|
| - | -  | -           | -               | Water - reused/goodie     | Waste Product (no LCI needed / only transportation accounted for) |
| G | US | 2015 - 2018 | Urea (agrarian) | Urea 45 (nitrogen source) | LCI*(45/46)                                                       |
| G | US | 2015 - 2018 | Urea (agrarian) | Urea 46 (nitrogen source) | Used as is                                                        |

Table S3. Global warming potential in kg CO<sub>2</sub>e per kg of mushroom product (unweighted average)

| <b>Inputs</b>      | <b>GWP<sub>20</sub></b> | <b>GWP<sub>20</sub> with climate change feedback</b> | <b>GWP<sub>100</sub></b> | <b>GWP<sub>100</sub> with climate change feedback</b> |
|--------------------|-------------------------|------------------------------------------------------|--------------------------|-------------------------------------------------------|
| Electricity        | 7.55×10 <sup>-1</sup>   | 7.56×10 <sup>-1</sup>                                | 6.94×10 <sup>-1</sup>    | 6.99×10 <sup>-1</sup>                                 |
| Diesel             | 2.30×10 <sup>-1</sup>   | 2.30×10 <sup>-1</sup>                                | 2.08×10 <sup>-1</sup>    | 2.09×10 <sup>-1</sup>                                 |
| Natural Gas        | 1.74×10 <sup>-1</sup>   | 1.74×10 <sup>-1</sup>                                | 1.28×10 <sup>-1</sup>    | 1.32×10 <sup>-1</sup>                                 |
| Heating Oil        | 1.58×10 <sup>-1</sup>   | 1.58×10 <sup>-1</sup>                                | 1.43×10 <sup>-1</sup>    | 1.44×10 <sup>-1</sup>                                 |
| LPG                | 1.80×10 <sup>-2</sup>   | 1.80×10 <sup>-2</sup>                                | 1.64×10 <sup>-2</sup>    | 1.65×10 <sup>-2</sup>                                 |
| Compost Materials  | 1.48×10 <sup>-1</sup>   | 1.49×10 <sup>-1</sup>                                | 1.26×10 <sup>-1</sup>    | 1.33×10 <sup>-1</sup>                                 |
| Spawn, Supplements | 3.69×10 <sup>-2</sup>   | 3.70×10 <sup>-2</sup>                                | 3.36×10 <sup>-2</sup>    | 3.45×10 <sup>-2</sup>                                 |
| Compost Emissions  | 9.45×10 <sup>-1</sup>   | 9.66×10 <sup>-1</sup>                                | 3.87×10 <sup>-1</sup>    | 4.61×10 <sup>-1</sup>                                 |
| Peat               | 7.93×10 <sup>-2</sup>   | 7.90×10 <sup>-2</sup>                                | 9.38×10 <sup>-2</sup>    | 9.27×10 <sup>-2</sup>                                 |
| Growing Materials  | 4.95×10 <sup>-3</sup>   | 4.95×10 <sup>-3</sup>                                | 5.00×10 <sup>-3</sup>    | 5.00×10 <sup>-3</sup>                                 |
| Refrigerants       | 1.70×10 <sup>-1</sup>   | 1.74×10 <sup>-1</sup>                                | 6.73×10 <sup>-2</sup>    | 7.95×10 <sup>-2</sup>                                 |
| Pesticides         | 7.22×10 <sup>-4</sup>   | 7.25×10 <sup>-4</sup>                                | 6.09×10 <sup>-4</sup>    | 6.21×10 <sup>-4</sup>                                 |
| Sanitizers         | 1.96×10 <sup>-3</sup>   | 1.96×10 <sup>-3</sup>                                | 1.75×10 <sup>-3</sup>    | 1.76×10 <sup>-3</sup>                                 |
| Total Transport    | 2.7×10 <sup>-1</sup>    | 2.75×10 <sup>-1</sup>                                | 2.57×10 <sup>-1</sup>    | 2.59×10 <sup>-1</sup>                                 |
| SMS Credits        | -1.95×10 <sup>-2</sup>  | -1.96×10 <sup>-2</sup>                               | -1.66×10 <sup>-2</sup>   | -1.75×10 <sup>-2</sup>                                |
| Peat Emissions     | 2.38×10 <sup>-1</sup>   | 2.38×10 <sup>-1</sup>                                | 2.38×10 <sup>-1</sup>    | 2.38×10 <sup>-1</sup>                                 |
| <b>Total</b>       | <b>3.21</b>             | <b>3.24</b>                                          | <b>2.38</b>              | <b>2.49</b>                                           |



Table S4. Non-renewable, renewable, and total primary energy use in MJ per kg of mushroom product (unweighted average)

| <b>Inputs</b>         | <b>Primary Energy from non-renewable resources (MJ)</b> | <b>Primary Energy from renewable resources (MJ)</b> | <b>Total Primary Energy (MJ)</b> |
|-----------------------|---------------------------------------------------------|-----------------------------------------------------|----------------------------------|
| Electricity           | 1.05×10                                                 | 1.09                                                | 1.16×10                          |
| Diesel                | 5.03                                                    | 4.12×10 <sup>-2</sup>                               | 5.08                             |
| Natural Gas           | 4.33                                                    | 1.75×10 <sup>-3</sup>                               | 4.33                             |
| Heating Oil           | 3.45                                                    | 2.83×10 <sup>-2</sup>                               | 3.48                             |
| LPG                   | 3.77×10 <sup>-1</sup>                                   | 6.08×10 <sup>-4</sup>                               | 3.78×10 <sup>-1</sup>            |
| Compost Materials     | 1.69                                                    | 5.58×10 <sup>-1</sup>                               | 2.25                             |
| Spawn and Supplements | 5.10×10 <sup>-1</sup>                                   | 4.13×10 <sup>-2</sup>                               | 5.52×10 <sup>-1</sup>            |
| Compost Emissions     | 0.00                                                    | 0.00                                                | 0.00                             |
| Peat                  | 2.36                                                    | 1.69×10 <sup>-2</sup>                               | 2.38                             |
| Growing Materials     | 3.88×10 <sup>-2</sup>                                   | 1.62×10 <sup>-3</sup>                               | 4.04×10 <sup>-2</sup>            |
| Refrigerants          | 3.68×10 <sup>-3</sup>                                   | 1.51×10 <sup>-4</sup>                               | 3.84×10 <sup>-3</sup>            |
| Pesticides            | 8.46×10 <sup>-3</sup>                                   | 4.01×10 <sup>-4</sup>                               | 8.87×10 <sup>-3</sup>            |
| Sanitizers            | 2.62×10 <sup>-2</sup>                                   | 6.69×10 <sup>-3</sup>                               | 3.29×10 <sup>-2</sup>            |
| Total Transport       | 3.43                                                    | 0.00                                                | 3.43                             |
| SMS Credits           | -1.88×10 <sup>-1</sup>                                  | -6.78×10 <sup>-3</sup>                              | -1.94×10 <sup>-1</sup>           |
| <b>Total</b>          | <b>3.16×10</b>                                          | <b>1.78</b>                                         | <b>3.34×10</b>                   |

Table S5. Total freshwater use in kg of water per kg of mushroom product (unweighted average)

| <b>Inputs</b>         | <b>Total Freshwater Use (kg)</b> |
|-----------------------|----------------------------------|
| Electricity           | $7.09 \times 10^2$               |
| Diesel                | 8.08                             |
| Natural Gas           | $7.48 \times 10^{-1}$            |
| Heating Oil           | 5.54                             |
| LPG                   | $3.57 \times 10^{-1}$            |
| Compost Materials     | $5.03 \times 10$                 |
| Spawn and Supplements | $1.34 \times 10$                 |
| Compost Emissions     | 0.00                             |
| Peat                  | $2.75 \times 10^{-1}$            |
| Growing Materials     | $7.41 \times 10^{-1}$            |
| Refrigerants          | $7.10 \times 10^{-2}$            |
| Pesticides            | $3.92 \times 10^{-3}$            |
| Sanitizers            | $8.07 \times 10^{-1}$            |
| Total Transport       | 0.00                             |
| On-Site Water Use     | 8.36                             |
| SMS Credits           | -2.89                            |
| <b>Total</b>          | $7.95 \times 10^2$               |

Table S6. CML impacts of Human Toxicity Potential (HTP), Marine Aquatic Ecotoxicity Potential (MAETP), Terrestrial Ecotoxicity Potential (TETP), Freshwater Aquatic Ecotoxicity Potential (FAETP), Acidification Potential (AP), Photochemical Ozone Creation Potential (POCP), Ozone Layer Depletion Potential (ODP), Eutrophication Potential (EP), Elements Abiotic Depletion (elements ADP), and Fossil Abiotic Depletion (fossil ADP) per kg of mushroom product (unweighted average)

| <b>Inputs</b>                    | <b>HTP<br/>(kg DCB<br/>eq.)</b> | <b>MAETP<br/>(kg DCB<br/>eq.)</b> | <b>TETP<br/>(kg DCB<br/>eq.)</b> | <b>FAETP<br/>(kg DCB<br/>eq.)</b> | <b>AP<br/>(kg SO<sub>2</sub><br/>eq.)</b> | <b>POCP<br/>(kg C<sub>2</sub>H<sub>4</sub><br/>eq.)</b> | <b>ODP<br/>(kg CFC-<br/>11 eq.)</b> | <b>EP<br/>(kg PO<sub>4</sub><br/>eq.)</b> | <b>Elements<br/>ADP (kg<br/>Sb eq.)</b> | <b>Fossil<br/>ADP<br/>(MJ)</b> |
|----------------------------------|---------------------------------|-----------------------------------|----------------------------------|-----------------------------------|-------------------------------------------|---------------------------------------------------------|-------------------------------------|-------------------------------------------|-----------------------------------------|--------------------------------|
| Electricity                      | 4.18×10 <sup>-2</sup>           | 5.21×10                           | 3.88×10 <sup>-4</sup>            | 1.17×10 <sup>-3</sup>             | 2.42×10 <sup>-3</sup>                     | 1.40×10 <sup>-4</sup>                                   | 3.01×10 <sup>-10</sup>              | 1.27×10 <sup>-4</sup>                     | 1.01×10 <sup>-7</sup>                   | 7.77                           |
| Diesel                           | 2.67×10 <sup>-1</sup>           | 2.05×10 <sup>2</sup>              | 2.59×10 <sup>-5</sup>            | 5.49×10 <sup>-2</sup>             | 2.00×10 <sup>-3</sup>                     | 2.06×10 <sup>-4</sup>                                   | 8.16×10 <sup>-12</sup>              | 4.43×10 <sup>-4</sup>                     | 2.65×10 <sup>-8</sup>                   | 5.00                           |
| Natural Gas                      | 4.86×10 <sup>-2</sup>           | 3.64×10                           | 1.51×10 <sup>-5</sup>            | 9.83×10 <sup>-3</sup>             | 9.91×10 <sup>-4</sup>                     | 5.63×10 <sup>-5</sup>                                   | 1.18×10 <sup>-13</sup>              | 2.00×10 <sup>-5</sup>                     | 6.39×10 <sup>-8</sup>                   | 4.33                           |
| Heating Oil                      | 1.21×10 <sup>-1</sup>           | 1.41×10 <sup>2</sup>              | 8.39×10 <sup>-5</sup>            | 3.76×10 <sup>-2</sup>             | 4.22×10 <sup>-4</sup>                     | 7.11×10 <sup>-5</sup>                                   | 5.59×10 <sup>-12</sup>              | 5.61×10 <sup>-5</sup>                     | 1.81×10 <sup>-8</sup>                   | 3.42                           |
| LPG                              | 1.42×10 <sup>-2</sup>           | 1.49×10                           | 2.01×10 <sup>-6</sup>            | 3.97×10 <sup>-3</sup>             | 4.82×10 <sup>-5</sup>                     | 7.97×10 <sup>-6</sup>                                   | 5.78×10 <sup>-13</sup>              | 6.17×10 <sup>-6</sup>                     | 1.98×10 <sup>-9</sup>                   | 3.75×10 <sup>-1</sup>          |
| Compost<br>Materials             | 5.31×10 <sup>-2</sup>           | 4.40×10                           | -6.83×10 <sup>-5</sup>           | 7.40×10 <sup>-3</sup>             | 2.16×10 <sup>-3</sup>                     | 6.12×10 <sup>-5</sup>                                   | 3.59×10 <sup>-9</sup>               | 6.23×10 <sup>-4</sup>                     | 1.17×10 <sup>-5</sup>                   | 1.59                           |
| Spawn,<br>Supplements<br>Compost | 1.22×10 <sup>-1</sup>           | 1.26×10                           | 3.59×10 <sup>-4</sup>            | 3.28×10 <sup>-3</sup>             | 2.79×10 <sup>-4</sup>                     | 1.80×10 <sup>-5</sup>                                   | 9.22×10 <sup>-12</sup>              | 6.53×10 <sup>-5</sup>                     | 6.08×10 <sup>-9</sup>                   | 4.67×10 <sup>-1</sup>          |
| Emissions                        | 2.21×10 <sup>-4</sup>           | 0.00                              | 0.00                             | 0.00                              | 3.54×10 <sup>-3</sup>                     | 5.98×10 <sup>-5</sup>                                   | 0.00                                | 8.84×10 <sup>-4</sup>                     | 0.00                                    | 0.00                           |
| Peat                             | 8.04×10 <sup>-4</sup>           | 3.38×10 <sup>-1</sup>             | 1.08×10 <sup>-5</sup>            | 1.53×10 <sup>-5</sup>             | 9.09×10 <sup>-6</sup>                     | -3.93×10 <sup>-7</sup>                                  | 2.26×10 <sup>-10</sup>              | 2.72×10 <sup>-6</sup>                     | 5.19×10 <sup>-9</sup>                   | 2.36                           |
| Growing<br>Materials             | 2.51×10 <sup>-4</sup>           | 6.86×10 <sup>-2</sup>             | 1.12×10 <sup>-5</sup>            | 7.51×10 <sup>-6</sup>             | 1.94×10 <sup>-6</sup>                     | 1.25×10 <sup>-7</sup>                                   | 2.20×10 <sup>-12</sup>              | 3.75×10 <sup>-7</sup>                     | 2.22×10 <sup>-10</sup>                  | 3.76×10 <sup>-2</sup>          |
| Refrigerants                     | 2.47×10 <sup>-5</sup>           | 1.03×10 <sup>-2</sup>             | 2.38×10 <sup>-7</sup>            | 9.41×10 <sup>-7</sup>             | 9.12×10 <sup>-7</sup>                     | 6.14×10 <sup>-8</sup>                                   | 1.38×10 <sup>-6</sup>               | 5.63×10 <sup>-8</sup>                     | 9.99×10 <sup>-9</sup>                   | 3.40×10 <sup>-3</sup>          |
| Pesticides                       | 1.57×10 <sup>-3</sup>           | 2.97×10 <sup>-1</sup>             | 4.66×10 <sup>-6</sup>            | 2.16×10 <sup>-5</sup>             | 9.93×10 <sup>-6</sup>                     | 7.01×10 <sup>-7</sup>                                   | 9.69×10 <sup>-11</sup>              | 1.19×10 <sup>-6</sup>                     | 5.17×10 <sup>-9</sup>                   | 7.53×10 <sup>-3</sup>          |
| Sanitizers                       | 5.43×10 <sup>-4</sup>           | 1.61×10 <sup>-1</sup>             | 3.34×10 <sup>-6</sup>            | 2.44×10 <sup>-5</sup>             | 5.64×10 <sup>-6</sup>                     | 6.72×10 <sup>-7</sup>                                   | 9.46×10 <sup>-12</sup>              | 9.95×10 <sup>-7</sup>                     | 1.76×10 <sup>-8</sup>                   | 2.31×10 <sup>-2</sup>          |
| Total                            |                                 |                                   |                                  |                                   |                                           |                                                         |                                     |                                           |                                         |                                |
| Transport                        | 2.05×10 <sup>-1</sup>           | 2.73×10 <sup>2</sup>              | 1.28×10 <sup>-5</sup>            | 7.21×10 <sup>-2</sup>             | 1.26×10 <sup>-3</sup>                     | 1.51×10 <sup>-4</sup>                                   | 9.07×10 <sup>-12</sup>              | 2.25×10 <sup>-4</sup>                     | 6.16×10 <sup>-11</sup>                  | 3.41                           |
| SMS Credits                      | -8.11×10 <sup>-4</sup>          | -2.66×10 <sup>-1</sup>            | -5.33×10 <sup>-6</sup>           | -4.19×10 <sup>-5</sup>            | -2.95×10 <sup>-5</sup>                    | -2.30×10 <sup>-6</sup>                                  | -9.38×10 <sup>-13</sup>             | -1.04×10 <sup>-5</sup>                    | -1.27×10 <sup>-8</sup>                  | -1.78×10 <sup>-1</sup>         |
| Total                            | 8.76×10 <sup>-1</sup>           | 7.80×10 <sup>2</sup>              | 8.43×10 <sup>-4</sup>            | 1.90×10 <sup>-1</sup>             | 1.31×10 <sup>-2</sup>                     | 7.71×10 <sup>-4</sup>                                   | 1.38×10 <sup>-6</sup>               | 2.45×10 <sup>-3</sup>                     | 1.20×10 <sup>-5</sup>                   | 2.86×10                        |

Table S7. TRACI impacts of Acidification, Ecotoxicity, Eutrophication, Human Health Particulate Air, Human Toxicity (cancer), Human Toxicity (non-cancer), Ozone Depletion, Resources (fossil fuels), and Smog Air per kg of mushroom product (weighted average)

| <b>Inputs</b>         | <b>Acidification<br/>(kg SO<sub>2</sub> eq.)</b> | <b>Ecotoxicity<br/>(CTUe)</b> | <b>Eutrophication<br/>(kg N eq.)</b> | <b>Human Health<br/>Particulate Air<br/>(kg PM<sub>2.5</sub> eq.)</b> | <b>Human<br/>Toxicity,<br/>cancer<br/>(CTUh)</b> | <b>Human<br/>Toxicity,<br/>non-cancer<br/>(CTUh)</b> | <b>Ozone<br/>Depletion<br/>(kg CFC-11<br/>eq.)</b> | <b>Resources,<br/>Fossil Fuels<br/>(MJ surplus<br/>energy)</b> | <b>Smog Air<br/>(kg O<sub>3</sub> eq.)</b> |
|-----------------------|--------------------------------------------------|-------------------------------|--------------------------------------|-----------------------------------------------------------------------|--------------------------------------------------|------------------------------------------------------|----------------------------------------------------|----------------------------------------------------------------|--------------------------------------------|
| Electricity           | 2.20×10 <sup>-3</sup>                            | 7.28×10 <sup>-4</sup>         | 9.00×10 <sup>-5</sup>                | 1.67×10 <sup>-4</sup>                                                 | 2.03×10 <sup>-11</sup>                           | 1.61×10 <sup>-12</sup>                               | 3.24×10 <sup>-10</sup>                             | 3.76×10 <sup>-1</sup>                                          | 1.76×10 <sup>-2</sup>                      |
| Diesel                | 1.78×10 <sup>-3</sup>                            | 7.48×10 <sup>-4</sup>         | 1.24×10 <sup>-4</sup>                | 9.99×10 <sup>-5</sup>                                                 | 1.12×10 <sup>-11</sup>                           | 4.48×10 <sup>-11</sup>                               | 5.72×10 <sup>-12</sup>                             | 4.75×10 <sup>-1</sup>                                          | 5.49×10 <sup>-2</sup>                      |
| Natural Gas           | 7.96×10 <sup>-4</sup>                            | 4.55×10 <sup>-4</sup>         | 9.48×10 <sup>-6</sup>                | 4.99×10 <sup>-5</sup>                                                 | 8.77×10 <sup>-12</sup>                           | 3.77×10 <sup>-12</sup>                               | 9.31×10 <sup>-14</sup>                             | 4.91×10 <sup>-1</sup>                                          | 2.68×10 <sup>-3</sup>                      |
| Heating Oil           | 4.98×10 <sup>-4</sup>                            | 8.09×10 <sup>-4</sup>         | 4.44×10 <sup>-5</sup>                | 3.05×10 <sup>-5</sup>                                                 | 9.09×10 <sup>-13</sup>                           | 5.30×10 <sup>-13</sup>                               | 6.45×10 <sup>-12</sup>                             | 5.36×10 <sup>-1</sup>                                          | 8.07×10 <sup>-3</sup>                      |
| LPG                   | 5.30×10 <sup>-5</sup>                            | 8.26×10 <sup>-5</sup>         | 2.51×10 <sup>-6</sup>                | 3.12×10 <sup>-6</sup>                                                 | 8.97×10 <sup>-14</sup>                           | 4.67×10 <sup>-14</sup>                               | 6.08×10 <sup>-13</sup>                             | 5.36×10 <sup>-2</sup>                                          | 9.51×10 <sup>-4</sup>                      |
| Compost               |                                                  |                               |                                      |                                                                       |                                                  |                                                      |                                                    |                                                                |                                            |
| Materials             | 2.94×10 <sup>-3</sup>                            | 2.73×10 <sup>-3</sup>         | 7.94×10 <sup>-4</sup>                | 1.97×10 <sup>-4</sup>                                                 | 6.27×10 <sup>-12</sup>                           | 6.36×10 <sup>-12</sup>                               | 6.57×10 <sup>-9</sup>                              | 1.10×10 <sup>-1</sup>                                          | 9.96×10 <sup>-3</sup>                      |
| Spawn,<br>Supplements | 3.80×10 <sup>-4</sup>                            | 7.99×10 <sup>-4</sup>         | 1.28×10 <sup>-4</sup>                | 3.87×10 <sup>-4</sup>                                                 | 1.63×10 <sup>-12</sup>                           | 7.98×10 <sup>-12</sup>                               | 1.22×10 <sup>-11</sup>                             | 6.16×10 <sup>-2</sup>                                          | 7.91×10 <sup>-3</sup>                      |
| Compost<br>Emissions  | 3.92×10 <sup>-3</sup>                            | 0                             | 2.48×10 <sup>-4</sup>                | 1.39×10 <sup>-4</sup>                                                 | 0                                                | 0                                                    | 0                                                  | 0                                                              | 1.35×10 <sup>-4</sup>                      |
| Peat                  | 1.11×10 <sup>-5</sup>                            | 3.13×10 <sup>-6</sup>         | 2.19×10 <sup>-6</sup>                | 9.20×10 <sup>-6</sup>                                                 | 2.49×10 <sup>-13</sup>                           | 2.28×10 <sup>-12</sup>                               | 3.10×10 <sup>-10</sup>                             | 2.74×10 <sup>-3</sup>                                          | 2.77×10 <sup>-4</sup>                      |
| Growing               |                                                  |                               |                                      |                                                                       |                                                  |                                                      |                                                    |                                                                |                                            |
| Materials             | 2.24×10 <sup>-6</sup>                            | 2.41×10 <sup>-6</sup>         | 3.36×10 <sup>-7</sup>                | 3.34×10 <sup>-7</sup>                                                 | 1.77×10 <sup>-14</sup>                           | 3.32×10 <sup>-14</sup>                               | 2.85×10 <sup>-12</sup>                             | 1.05×10 <sup>-3</sup>                                          | 4.75×10 <sup>-5</sup>                      |
| Refrigerants          | 1.09×10 <sup>-6</sup>                            | 8.11×10 <sup>-7</sup>         | 3.96×10 <sup>-8</sup>                | 5.08×10 <sup>-7</sup>                                                 | 1.05×10 <sup>-14</sup>                           | 2.59×10 <sup>-13</sup>                               | 1.51×10 <sup>-6</sup>                              | 5.04×10 <sup>-4</sup>                                          | 1.04×10 <sup>-5</sup>                      |
| Pesticides            | 4.02×10 <sup>-6</sup>                            | 2.61×10 <sup>-5</sup>         | 7.97×10 <sup>-7</sup>                | 3.43×10 <sup>-7</sup>                                                 | 1.12×10 <sup>-13</sup>                           | 3.54×10 <sup>-14</sup>                               | 3.96×10 <sup>-11</sup>                             | 4.16×10 <sup>-4</sup>                                          | 1.66×10 <sup>-5</sup>                      |
| Sanitizers            | 1.26×10 <sup>-6</sup>                            | 6.10×10 <sup>-7</sup>         | 3.94×10 <sup>-7</sup>                | 1.92×10 <sup>-7</sup>                                                 | 4.93×10 <sup>-14</sup>                           | 1.54×10 <sup>-14</sup>                               | 5.76×10 <sup>-12</sup>                             | 3.65×10 <sup>-4</sup>                                          | 1.37×10 <sup>-5</sup>                      |
| Total                 |                                                  |                               |                                      |                                                                       |                                                  |                                                      |                                                    |                                                                |                                            |
| Transport             | 1.12×10 <sup>-3</sup>                            | 1.53×10 <sup>-4</sup>         | 6.23×10 <sup>-5</sup>                | 4.70×10 <sup>-5</sup>                                                 | 3.81×10 <sup>-13</sup>                           | 3.91×10 <sup>-13</sup>                               | 6.65×10 <sup>-12</sup>                             | 3.48×10 <sup>-1</sup>                                          | 3.07×10 <sup>-2</sup>                      |
| SMS Credits           | -1.51×10 <sup>-5</sup>                           | -2.00×10 <sup>-5</sup>        | -2.00×10 <sup>-6</sup>               | -3.69×10 <sup>-6</sup>                                                | -1.47×10 <sup>-13</sup>                          | -1.50×10 <sup>-14</sup>                              | -4.06×10 <sup>-13</sup>                            | -9.48×10 <sup>-3</sup>                                         | -1.42×10 <sup>-4</sup>                     |
| Total                 | 1.37×10 <sup>-2</sup>                            | 6.52×10 <sup>-3</sup>         | 1.51×10 <sup>-3</sup>                | 1.13×10 <sup>-3</sup>                                                 | 4.98×10 <sup>-11</sup>                           | 6.81×10 <sup>-11</sup>                               | 1.52×10 <sup>-6</sup>                              | 2.45                                                           | 1.33×10 <sup>-1</sup>                      |

Table S8. TRACI impacts of Acidification, Ecotoxicity, Eutrophication, Human Health Particulate Air, Human Toxicity (cancer), Human Toxicity (non-cancer), Ozone Depletion, Resources (fossil fuels), and Smog Air per kg of mushroom product (unweighted average)

| <b>Inputs</b>         | <b>Acidification<br/>(kg SO<sub>2</sub> eq.)</b> | <b>Ecotoxicity<br/>(CTUe)</b> | <b>Eutrophication<br/>(kg N eq.)</b> | <b>Human Health<br/>Particulate Air<br/>(kg PM<sub>2.5</sub> eq.)</b> | <b>Human<br/>Toxicity,<br/>cancer<br/>(CTUh)</b> | <b>Human<br/>Toxicity,<br/>non-cancer<br/>(CTUh)</b> | <b>Ozone<br/>Depletion<br/>(kg CFC-11<br/>eq.)</b> | <b>Resources,<br/>Fossil Fuels<br/>(MJ surplus<br/>energy)</b> | <b>Smog Air<br/>(kg O<sub>3</sub> eq.)</b> |
|-----------------------|--------------------------------------------------|-------------------------------|--------------------------------------|-----------------------------------------------------------------------|--------------------------------------------------|------------------------------------------------------|----------------------------------------------------|----------------------------------------------------------------|--------------------------------------------|
| Electricity           | 2.25×10 <sup>-3</sup>                            | 7.92×10 <sup>-4</sup>         | 9.33×10 <sup>-5</sup>                | 1.70×10 <sup>-4</sup>                                                 | 2.10×10 <sup>-11</sup>                           | 1.58×10 <sup>-12</sup>                               | 3.20×10 <sup>-10</sup>                             | 4.15×10 <sup>-1</sup>                                          | 1.82×10 <sup>-2</sup>                      |
| Diesel                | 2.58×10 <sup>-3</sup>                            | 1.08×10 <sup>-3</sup>         | 1.80×10 <sup>-4</sup>                | 1.44×10 <sup>-4</sup>                                                 | 1.61×10 <sup>-11</sup>                           | 6.48×10 <sup>-11</sup>                               | 8.27×10 <sup>-12</sup>                             | 6.87×10 <sup>-1</sup>                                          | 7.93×10 <sup>-2</sup>                      |
| Natural Gas           | 8.67×10 <sup>-4</sup>                            | 6.90×10 <sup>-4</sup>         | 1.13×10 <sup>-5</sup>                | 5.42×10 <sup>-5</sup>                                                 | 9.56×10 <sup>-12</sup>                           | 4.06×10 <sup>-12</sup>                               | 1.25×10 <sup>-13</sup>                             | 6.44×10 <sup>-1</sup>                                          | 3.34×10 <sup>-3</sup>                      |
| Heating Oil           | 4.37×10 <sup>-4</sup>                            | 7.09×10 <sup>-4</sup>         | 3.89×10 <sup>-5</sup>                | 2.67×10 <sup>-5</sup>                                                 | 7.97×10 <sup>-13</sup>                           | 4.65×10 <sup>-13</sup>                               | 5.66×10 <sup>-12</sup>                             | 4.70×10 <sup>-1</sup>                                          | 7.08×10 <sup>-3</sup>                      |
| LPG                   | 5.09×10 <sup>-5</sup>                            | 7.94×10 <sup>-5</sup>         | 2.42×10 <sup>-6</sup>                | 3.00×10 <sup>-6</sup>                                                 | 8.62×10 <sup>-14</sup>                           | 4.49×10 <sup>-14</sup>                               | 5.84×10 <sup>-13</sup>                             | 5.15×10 <sup>-2</sup>                                          | 9.15×10 <sup>-4</sup>                      |
| Compost               |                                                  |                               |                                      |                                                                       |                                                  |                                                      |                                                    |                                                                |                                            |
| Materials             | 2.38×10 <sup>-3</sup>                            | 3.85×10 <sup>-3</sup>         | 7.21×10 <sup>-4</sup>                | 1.57×10 <sup>-4</sup>                                                 | 5.60×10 <sup>-12</sup>                           | 7.46×10 <sup>-12</sup>                               | 4.55×10 <sup>-9</sup>                              | 2.24×10 <sup>-1</sup>                                          | 9.98×10 <sup>-3</sup>                      |
| Spawn,<br>Supplements | 3.32×10 <sup>-4</sup>                            | 6.99×10 <sup>-4</sup>         | 1.12×10 <sup>-4</sup>                | 3.38×10 <sup>-4</sup>                                                 | 1.42×10 <sup>-12</sup>                           | 6.98×10 <sup>-12</sup>                               | 1.07×10 <sup>-11</sup>                             | 5.39×10 <sup>-2</sup>                                          | 6.92×10 <sup>-3</sup>                      |
| Compost               |                                                  |                               |                                      |                                                                       |                                                  |                                                      |                                                    |                                                                |                                            |
| Emissions             | 4.16×10 <sup>-3</sup>                            | 0                             | 2.63×10 <sup>-4</sup>                | 1.47×10 <sup>-4</sup>                                                 | 0                                                | 0                                                    | 0                                                  | 0                                                              | 1.43×10 <sup>-4</sup>                      |
| Peat                  | 1.07×10 <sup>-5</sup>                            | 3.03×10 <sup>-6</sup>         | 2.12×10 <sup>-6</sup>                | 8.88×10 <sup>-6</sup>                                                 | 2.41×10 <sup>-13</sup>                           | 2.20×10 <sup>-12</sup>                               | 2.99×10 <sup>-10</sup>                             | 2.64×10 <sup>-3</sup>                                          | 2.67×10 <sup>-4</sup>                      |
| Growing               |                                                  |                               |                                      |                                                                       |                                                  |                                                      |                                                    |                                                                |                                            |
| Materials             | 2.26×10 <sup>-6</sup>                            | 2.43×10 <sup>-6</sup>         | 3.40×10 <sup>-7</sup>                | 3.36×10 <sup>-7</sup>                                                 | 1.78×10 <sup>-14</sup>                           | 3.38×10 <sup>-14</sup>                               | 2.90×10 <sup>-12</sup>                             | 1.05×10 <sup>-3</sup>                                          | 4.78×10 <sup>-5</sup>                      |
| Refrigerants          | 8.77×10 <sup>-7</sup>                            | 6.52×10 <sup>-7</sup>         | 3.20×10 <sup>-8</sup>                | 4.08×10 <sup>-7</sup>                                                 | 8.45×10 <sup>-15</sup>                           | 2.41×10 <sup>-13</sup>                               | 1.38×10 <sup>-6</sup>                              | 4.05×10 <sup>-4</sup>                                          | 8.40×10 <sup>-6</sup>                      |
| Pesticides            | 1.02×10 <sup>-5</sup>                            | 6.46×10 <sup>-5</sup>         | 2.10×10 <sup>-6</sup>                | 8.89×10 <sup>-7</sup>                                                 | 2.71×10 <sup>-13</sup>                           | 9.00×10 <sup>-14</sup>                               | 1.07×10 <sup>-10</sup>                             | 1.10×10 <sup>-3</sup>                                          | 4.42×10 <sup>-5</sup>                      |
| Sanitizers            | 5.99×10 <sup>-6</sup>                            | 4.14×10 <sup>-6</sup>         | 1.16×10 <sup>-6</sup>                | 6.73×10 <sup>-7</sup>                                                 | 1.48×10 <sup>-13</sup>                           | 3.03×10 <sup>-14</sup>                               | 1.19×10 <sup>-11</sup>                             | 2.40×10 <sup>-3</sup>                                          | 7.80×10 <sup>-5</sup>                      |
| Total                 |                                                  |                               |                                      |                                                                       |                                                  |                                                      |                                                    |                                                                |                                            |
| Transport             | 1.54×10 <sup>-3</sup>                            | 2.09×10 <sup>-4</sup>         | 8.52×10 <sup>-5</sup>                | 6.42×10 <sup>-5</sup>                                                 | 5.21×10 <sup>-13</sup>                           | 5.34×10 <sup>-13</sup>                               | 9.09×10 <sup>-12</sup>                             | 4.75×10 <sup>-1</sup>                                          | 4.20×10 <sup>-2</sup>                      |
| SMS Credits           | -3.69×10 <sup>-5</sup>                           | -4.91×10 <sup>-5</sup>        | -4.92×10 <sup>-6</sup>               | -9.05×10 <sup>-6</sup>                                                | -3.61×10 <sup>-13</sup>                          | -3.69×10 <sup>-14</sup>                              | -9.97×10 <sup>-13</sup>                            | -2.33×10 <sup>-2</sup>                                         | -3.49×10 <sup>-4</sup>                     |
| Total                 | 1.46×10 <sup>-2</sup>                            | 8.14×10 <sup>-3</sup>         | 1.51×10 <sup>-3</sup>                | 1.11×10 <sup>-3</sup>                                                 | 5.55×10 <sup>-11</sup>                           | 8.85×10 <sup>-11</sup>                               | 1.38×10 <sup>-6</sup>                              | 3.00                                                           | 1.68×10 <sup>-1</sup>                      |

Table S9. Average transport distances of each material from the manufacturer to the facility gate by phase for U.S. mushroom production

| Category                      | Input Material                                                                         | Average Distance Transported (miles) |
|-------------------------------|----------------------------------------------------------------------------------------|--------------------------------------|
| Compost Materials (Phase 1)   | Ammonium sulfate                                                                       | 60                                   |
| Compost Materials (Phase 1)   | Distiller's grain                                                                      | 135                                  |
| Growing Materials (Phase 3)   | Casing inoculum                                                                        | 822                                  |
| Compost Materials (Phase 1)   | Cocoa bean hulls                                                                       | 80                                   |
| Natural Gas                   | Compressed natural gas                                                                 | N/A <sup>a</sup>                     |
| Compost Materials (Phase 1)   | Corn stover                                                                            | 68                                   |
| Compost Materials (Phase 1)   | Corncobs                                                                               | 700                                  |
| Compost Materials (Phase 1)   | Cotton seed burrs                                                                      | 135                                  |
| Compost Materials (Phase 1)   | Cotton seed hulls                                                                      | 181                                  |
| Compost Materials (Phase 1)   | Cotton seed meal                                                                       | 304                                  |
| Diesel                        | Diesel                                                                                 | N/A                                  |
| Compost Materials (Phase 1)   | Dried poultry waste                                                                    | 121                                  |
| Electricity                   | Electricity                                                                            | N/A                                  |
| Electricity                   | Electricity generation fuel – walnut shells                                            | 25                                   |
| Compost Materials (Phase 1)   | Grape pomace                                                                           | 96                                   |
| Compost Materials (Phase 1)   | Gypsum – mined                                                                         | 251                                  |
| Compost Materials (Phase 1)   | Gypsum – recycled                                                                      | 131                                  |
| Compost Materials (Phase 1)   | Hardwood tree leaves                                                                   | 5                                    |
| Compost Materials (Phase 1)   | Hay                                                                                    | 158                                  |
| Heating Oil                   | Heating oil                                                                            | N/A                                  |
| Growing Materials (Phase 3)   | Lime – hydrated                                                                        | 83                                   |
| Growing Materials (Phase 3)   | Lime – sugar beet                                                                      | 413                                  |
| Growing Materials (Phase 3)   | Limestone                                                                              | 104                                  |
| Liquefied Petroleum Gas (LPG) | LPG                                                                                    | 10                                   |
| Natural Gas                   | Natural gas                                                                            | N/A                                  |
| Compost Materials (Phase 1)   | Nitrogen sources - other                                                               | 155                                  |
| Peat                          | Peat moss – black/reed sedge                                                           | 2439                                 |
| Peat                          | Peat moss - sphagnum                                                                   | 1613                                 |
| Pesticides                    | Pesticides (Pesticides, insecticides, fungicides, herbicides)                          | 480                                  |
| Compost Materials (Phase 1)   | Pima <sup>b</sup>                                                                      | 96                                   |
| Compost Materials (Phase 1)   | Poultry litter                                                                         | 120                                  |
| Refrigerants                  | Refrigerants (Propylene glycol, R11 <sup>c</sup> , R12, R22, R123, R410a, Unspecified) | 65                                   |
| Sanitizers                    | Sanitizers                                                                             | 87                                   |
| Spawn and Supplements         | Spawn                                                                                  | 648                                  |
| Compost Materials (Phase 1)   | Straw-bedded horse manure                                                              | 105                                  |
| Compost Materials (Phase 1)   | Straw – wheat                                                                          | 206                                  |
| Spawn and Supplements         | Supplements                                                                            | 332                                  |
| Compost Materials (Phase 1)   | Urea 45                                                                                | 33                                   |
| Compost Materials (Phase 1)   | Urea 46                                                                                | 13                                   |

<sup>a</sup> Average distance transported is not applicable (N/A) in the case that transport distance is already accounted for in the reference life cycle inventory data.

<sup>b</sup> Pima is a cotton waste of the Pima variety of cotton.

<sup>c</sup> R11 refers to refrigerant 11, as R12, R22, R123, and R410a refer to refrigerants 12, 22, 123, and 410a, respectively
